# Supplementary material for: piRNA-36741 regulates BMP2-mediated osteoblast differentiation via METTL3 controlled m6A modification
Source: publisher site journal article supplement (doi:10.18632/aging.203630), 2021-10-13
Supplement: Supplementary file [file aging-v13i19-203630-supplementary-material-SD1.pdf]

## SUPPLEMENTARY FIGURE

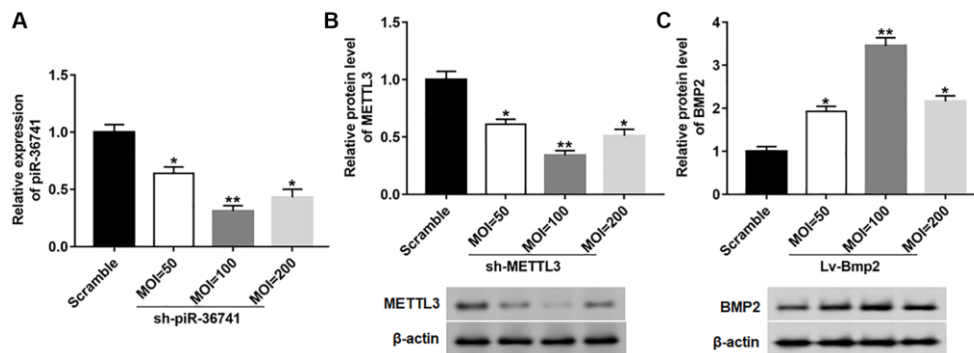

**Supplementary Figure 1. Optimizing the multiplicity of infection (MOI) for lentivirus.** (A) BMSCs were infected with Lv-sh-piR-36741 with a MOI of 50, 100, or 200, and the expression of piR-36741 was measured with RT-qPCR. (B, C) BMSCs were infected with Lv-sh-METTL3/Lv-BMP2 with a MOI of 50, 100, or 200, and the protein levels of METTL3/BMP2 were determined with Western blotting.  $N = 5$  in each group. \* $P < 0.05$ , \*\* $P < 0.01$ . Each test was independently repeated at least three times.
